# Supplementary material for: Health Insurance and Differences in Infant Mortality Rates in the US
Source: PubMed Central journal article supplement (PMC10576209; doi:10.1001/jamanetworkopen.2023.37690), 2023-10-13
Supplement: jamanetwopen-e2337690-s001.pdf [file jamanetwopen-e2337690-s001.pdf]

## Data Sharing Statement

Johnson. Health Insurance and Differences in Infant Mortality Rates in the US. *JAMA Netw Open*. Published October 13, 2023. doi:10.1001/jamanetworkopen.2023.37690

### Data

**Data available:** No

### Additional Information

**Explanation for why data not available:** All data were produced by the National Center for Health Statistics and retrieved from the CDC WONDER expanded database using R version 4.0.
